# Supplementary material for: Aerosol Assisted Chemical Vapor Deposition of Cobalt-based Co-Catalysts on Bismuth Vanadate-based Photoelectrodes for Solar Water Splitting Systems
Source: Research Square preprint supplement (doi:10.21203/rs.3.rs-7510016/v1), 2025-09-11
Supplement: Supplementary file 1 [file 8c274a014da5d3834c4634e4.docx]

# Supplementary Information

Aerosol Assisted Chemical Vapor Deposition of Cobalt Phosphate Co-Catalysts on BiVO4-based Photoelectrodes for Solar Water Splitting Systems

Mengyuan Huang1, George Creasey,1,2 Zhipeng Lin1, Anna Hankin2, Brian Tam1* and Andreas Kafizas1,3*

*co-corresponding authors = [b.tam18@imperial.ac.uk](mailto:b.tam18@imperial.ac.uk) and [a.kafizas@imperial.ac.uk](mailto:a.kafizas@imperial.ac.uk)

*1Department of Chemistry, Molecular Sciences Research Hub, Imperial College London, White City, London, W12 0BZ, UK*

*2Department of Chemical Engineering, Imperial College London, South Kensington, London, London, SW7 2AZ, UK*

*3London Centre for Nanotechnology, Imperial College London, South Kensington, London, SW7 2AZ, UK*


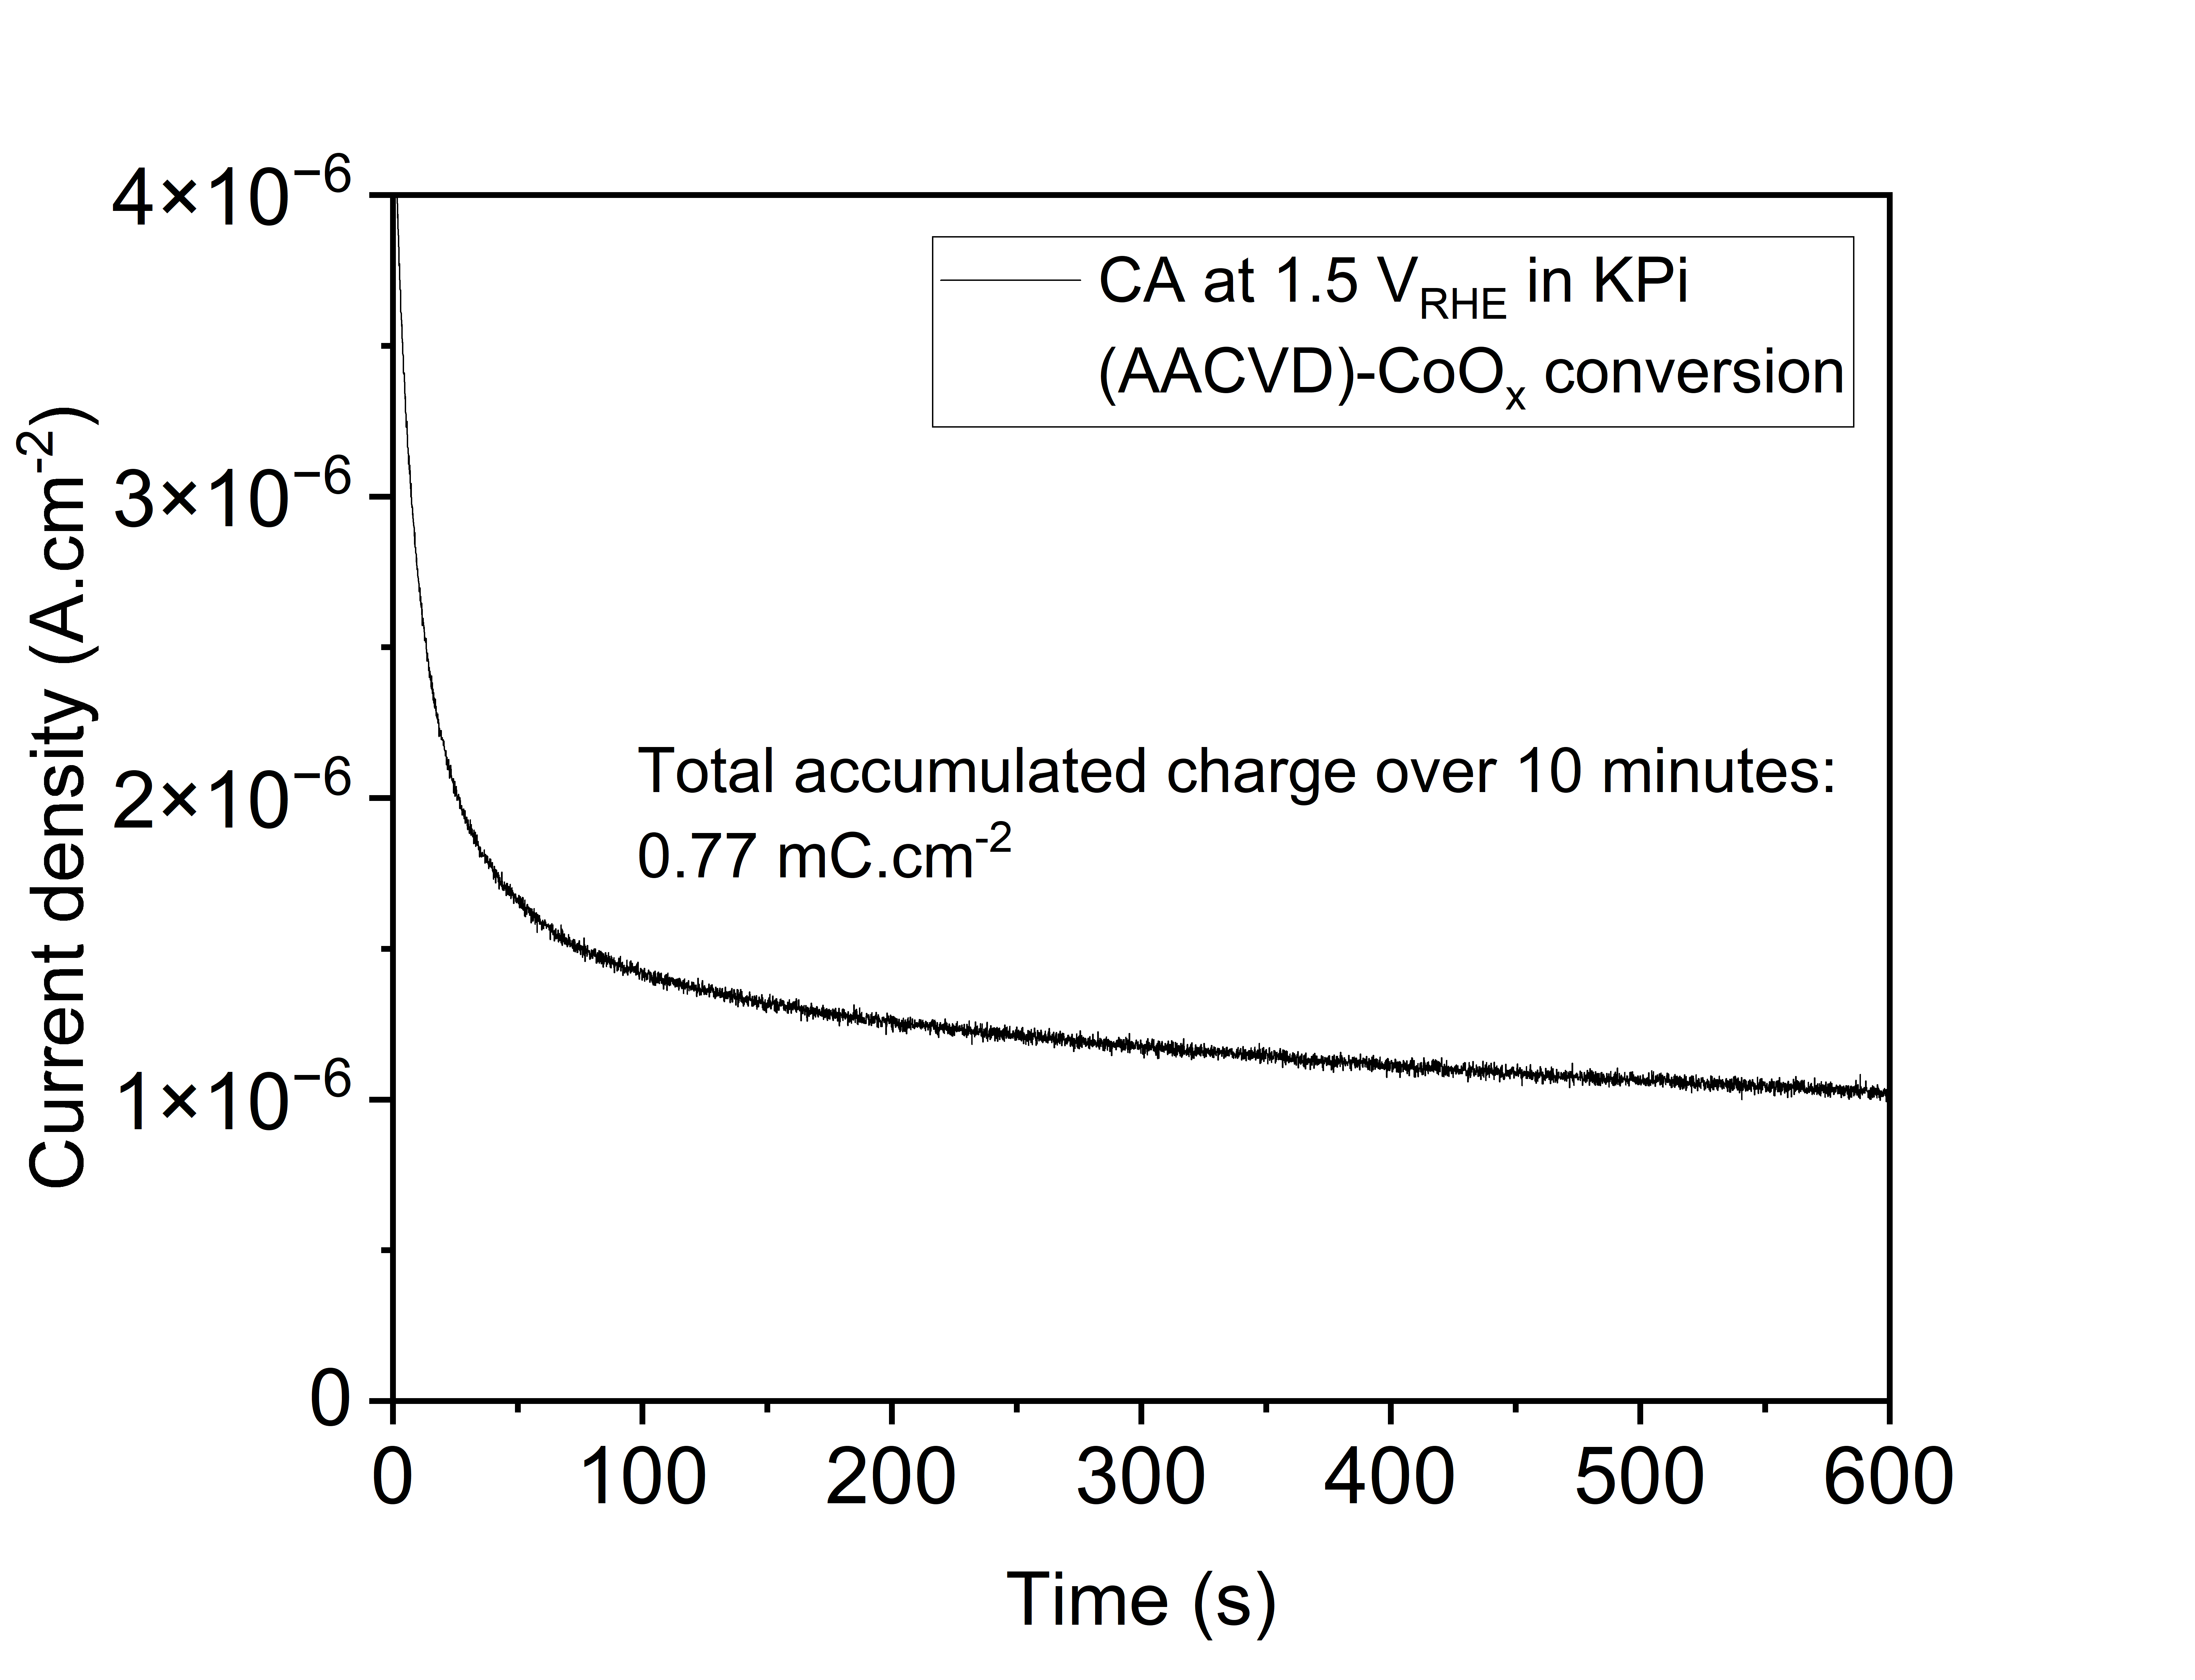


Figure S1. Chronoamperometry recorded for the electrochemical conversion of CoOx to CoPi in the dark. The experiment was conducted in a pH 7.0, 0.1 M potassium phosphate (KPi) buffer at an applied potential of 1.5 VRHE for 600 seconds for a geometric area of 2 cm2. The CoOx thin film was 80 nm thick and deposited via AACVD under air using 20 mL 0.5 mM Co(acac)₂ solution.

Taking 0.77 mC.cm-2 to be proportional to the conversion of Co2+ in CoO to Co3+ in CoPO4 with m/w of 154 g/mol, the total converted species is 4.81 x 1015 CoPO4 or 7.98 x 10-9 mol, which is 1.22 x 10-6 g. With an approximate density of 4 g.cm-3, and 2 cm2 film area, the CoPi would be expected to have a mass/thickness of 8 g per cm. Thus, the layer of CoPi would be 1.22 x 10-6 / 8 = 1.53 nm thick.

 
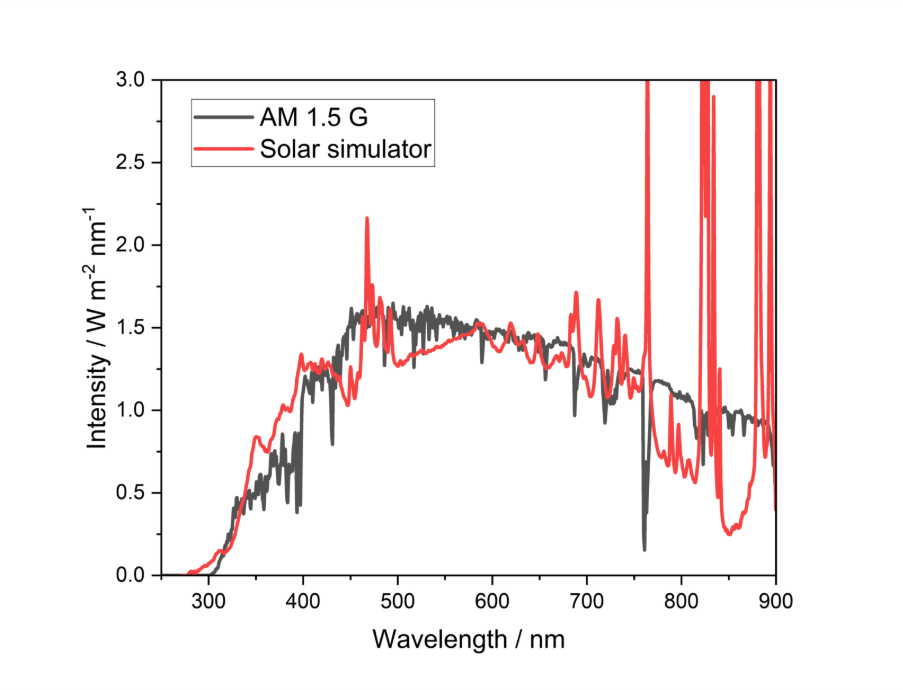


*Figure S2. Spectrum of the Sun2000 solar simulator equipped with an AM 1.5G filter, used for one sun measurements 100 mW cm-2, compared with the NREL AM 1.5G reference spectrum.1*


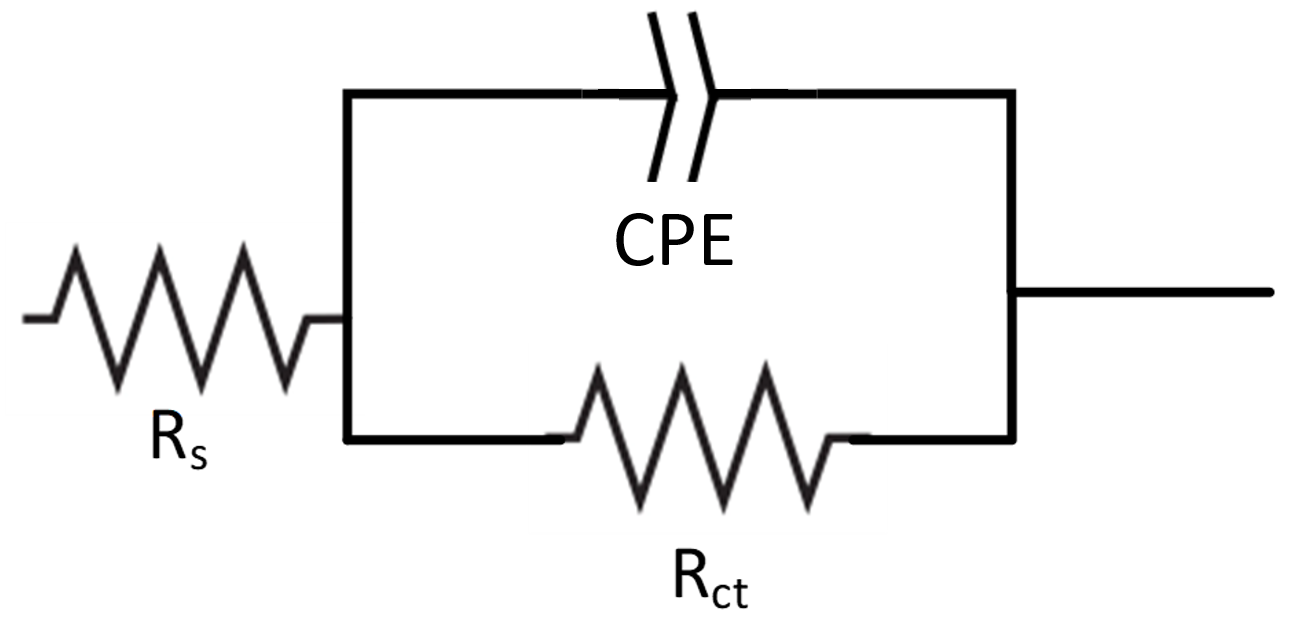


*Figure S3.  Equivalent electrical circuit (comprised of two resistors and a constant phase element (CPE) used for fitting PEIS spectra shown in Figure 6.*

*Table S1. Effect of co-catalysts on resistance and capacitance values of BiVO4 electrodes*

| **Electrode** | **Rs (Ω)** | **Rct (Ω)** | **CPE (μS·sN)** | **N** |
| --- | --- | --- | --- | --- |
| (AACVD)-CoOx BiVO4 | 81 | 2450 | 67 | 0.603 |
| (AACVD+ET)-CoPi BiVO4 | 81 | 533 | 158 | 0.434 |
| (PED)-CoPi BiVO4 | 81 | 500 | 10.4 | 0.746 |

Note: bare BiVO4 could not be reliably fitted with the model in Figure S3, likely due to inefficient charge transfer processes in the absence of active co-catalyst sites. Therefore, it was not possible to make a comparison to the equivalent circuit parameters for the BiVO4 electrodes with co-catalysts.


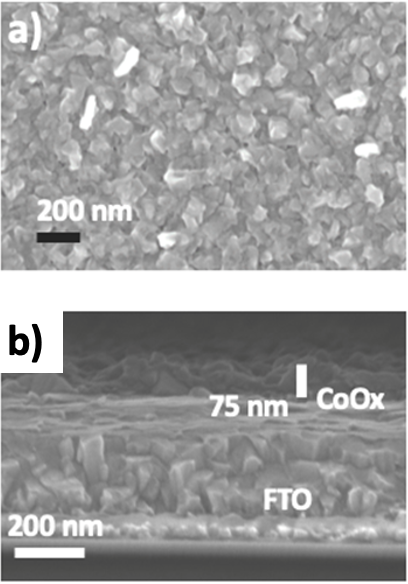


Figure S4**.** a) Top-down SEM image of (AACVD)-CoOx on FTO, and b) side-on SEM image of -(AACVD)-CoOx on FTO


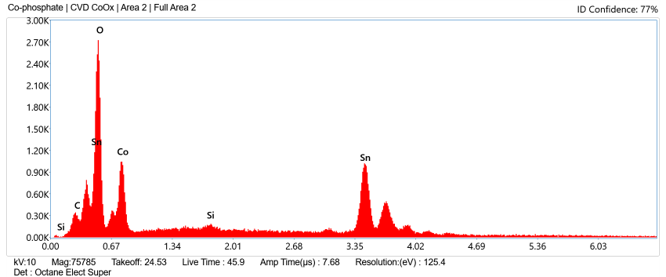


*Figure S5. X-ray spectra of elements detected by EDX analysis (AACVD+ET)-CoPi on FTO*

*
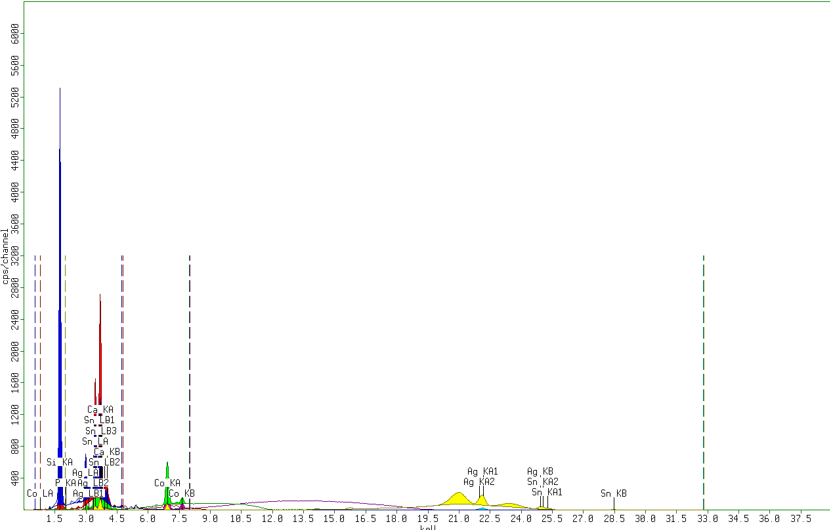
*

*Figure S6. XRF spectra of elements detected by XRF analysis (AACVD+ET)-CoPi on FTO*

*
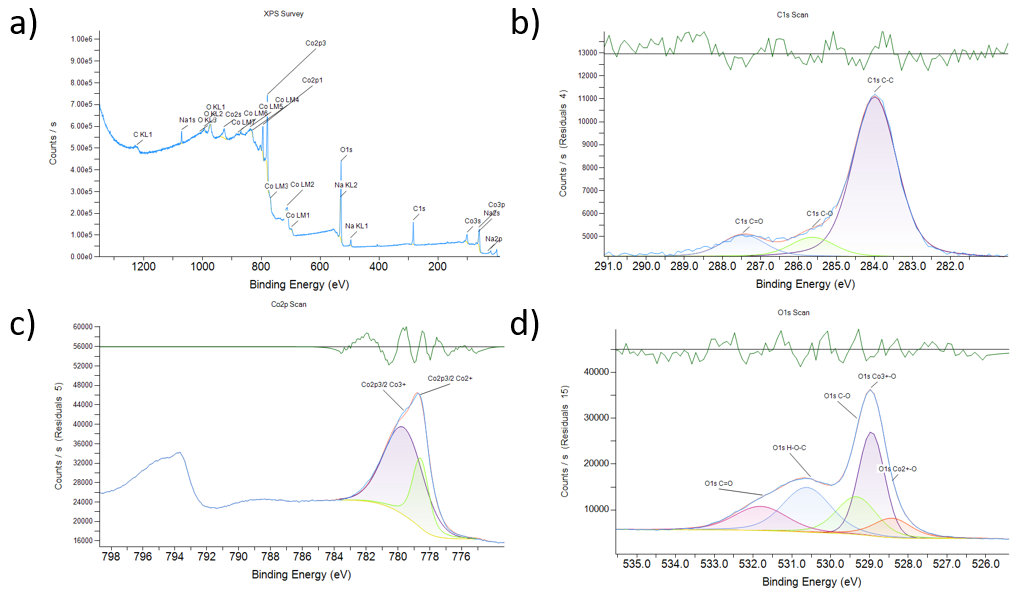
*

*
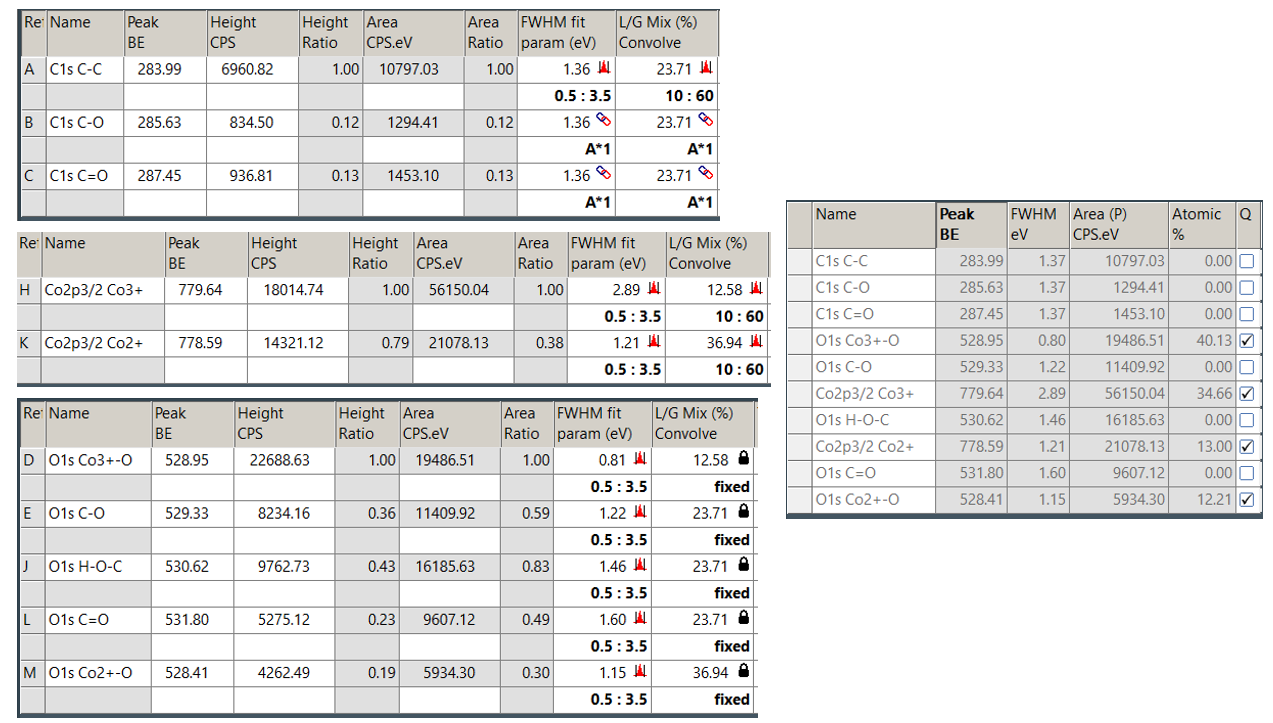
*

*Figure S7. XPS spectra of AACVD CoOx for a) survey scan, b) C 1s, c) Co 2p, d) O 1s, and corresponding fitting data tables and atomic% calculated with Avantage software*

*
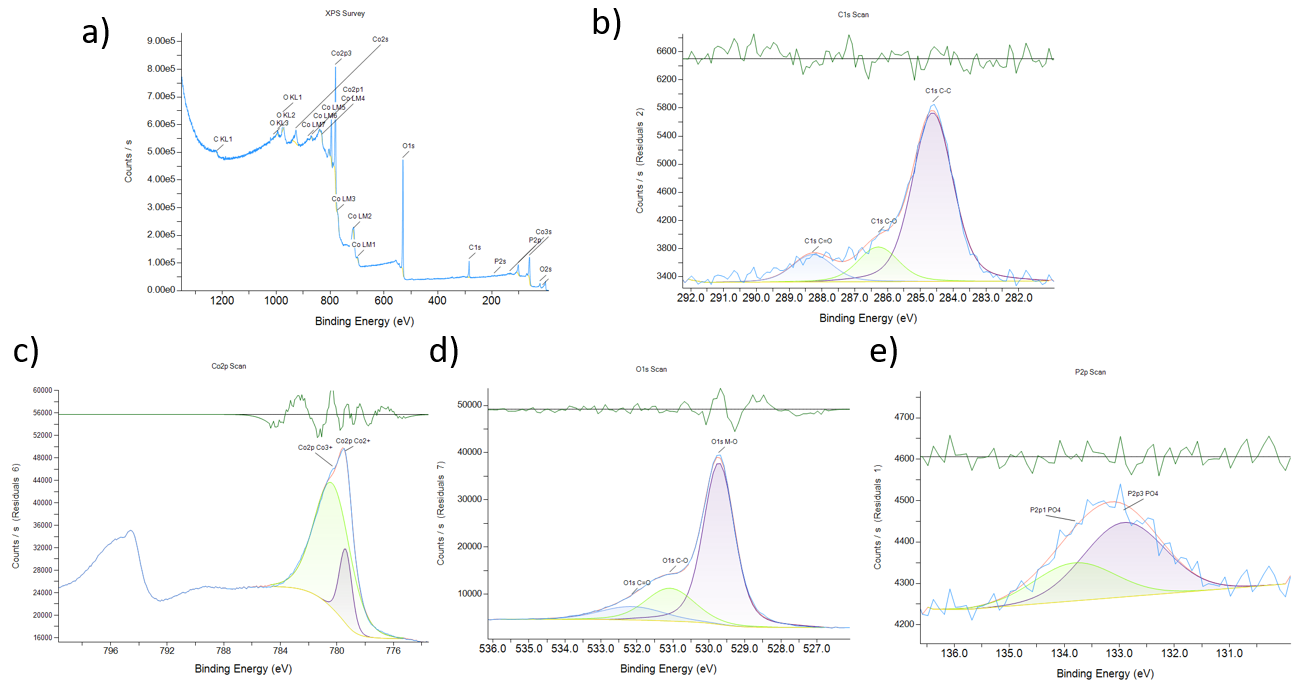
*

*
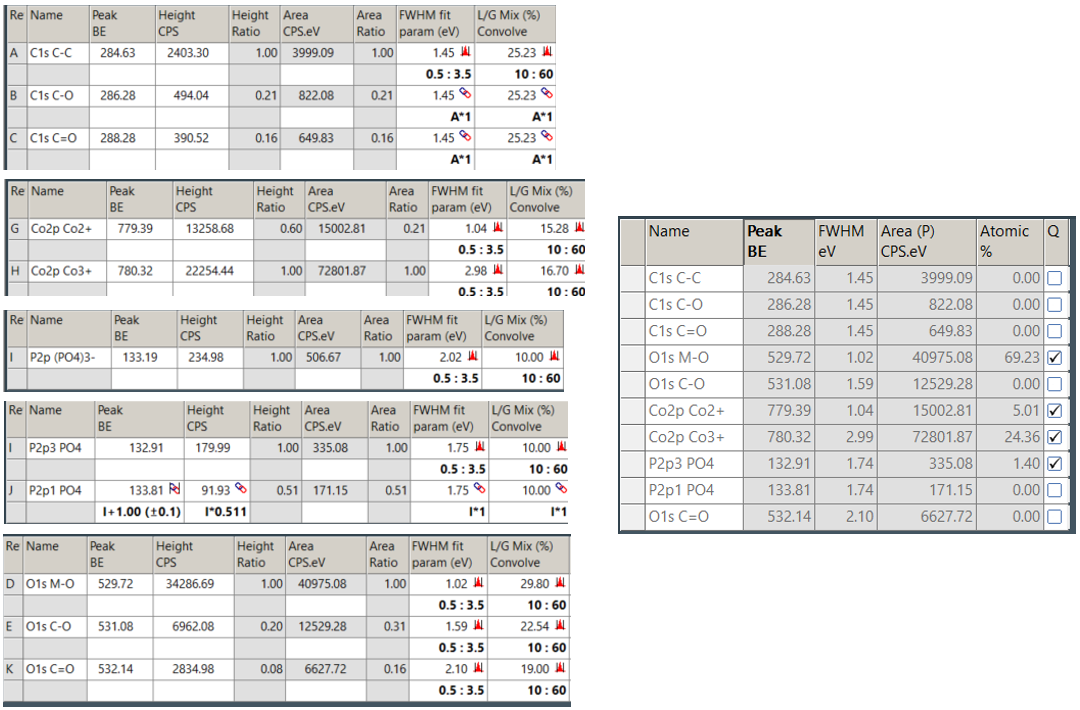
*

*Figure S8. XPS spectra of AACVD+ET CoPi for a) survey scan, b) C 1s, c) Co 2p, d) O 1s, e) P 2p, and corresponding fitting data tables and atomic% calculated with Avantage software*


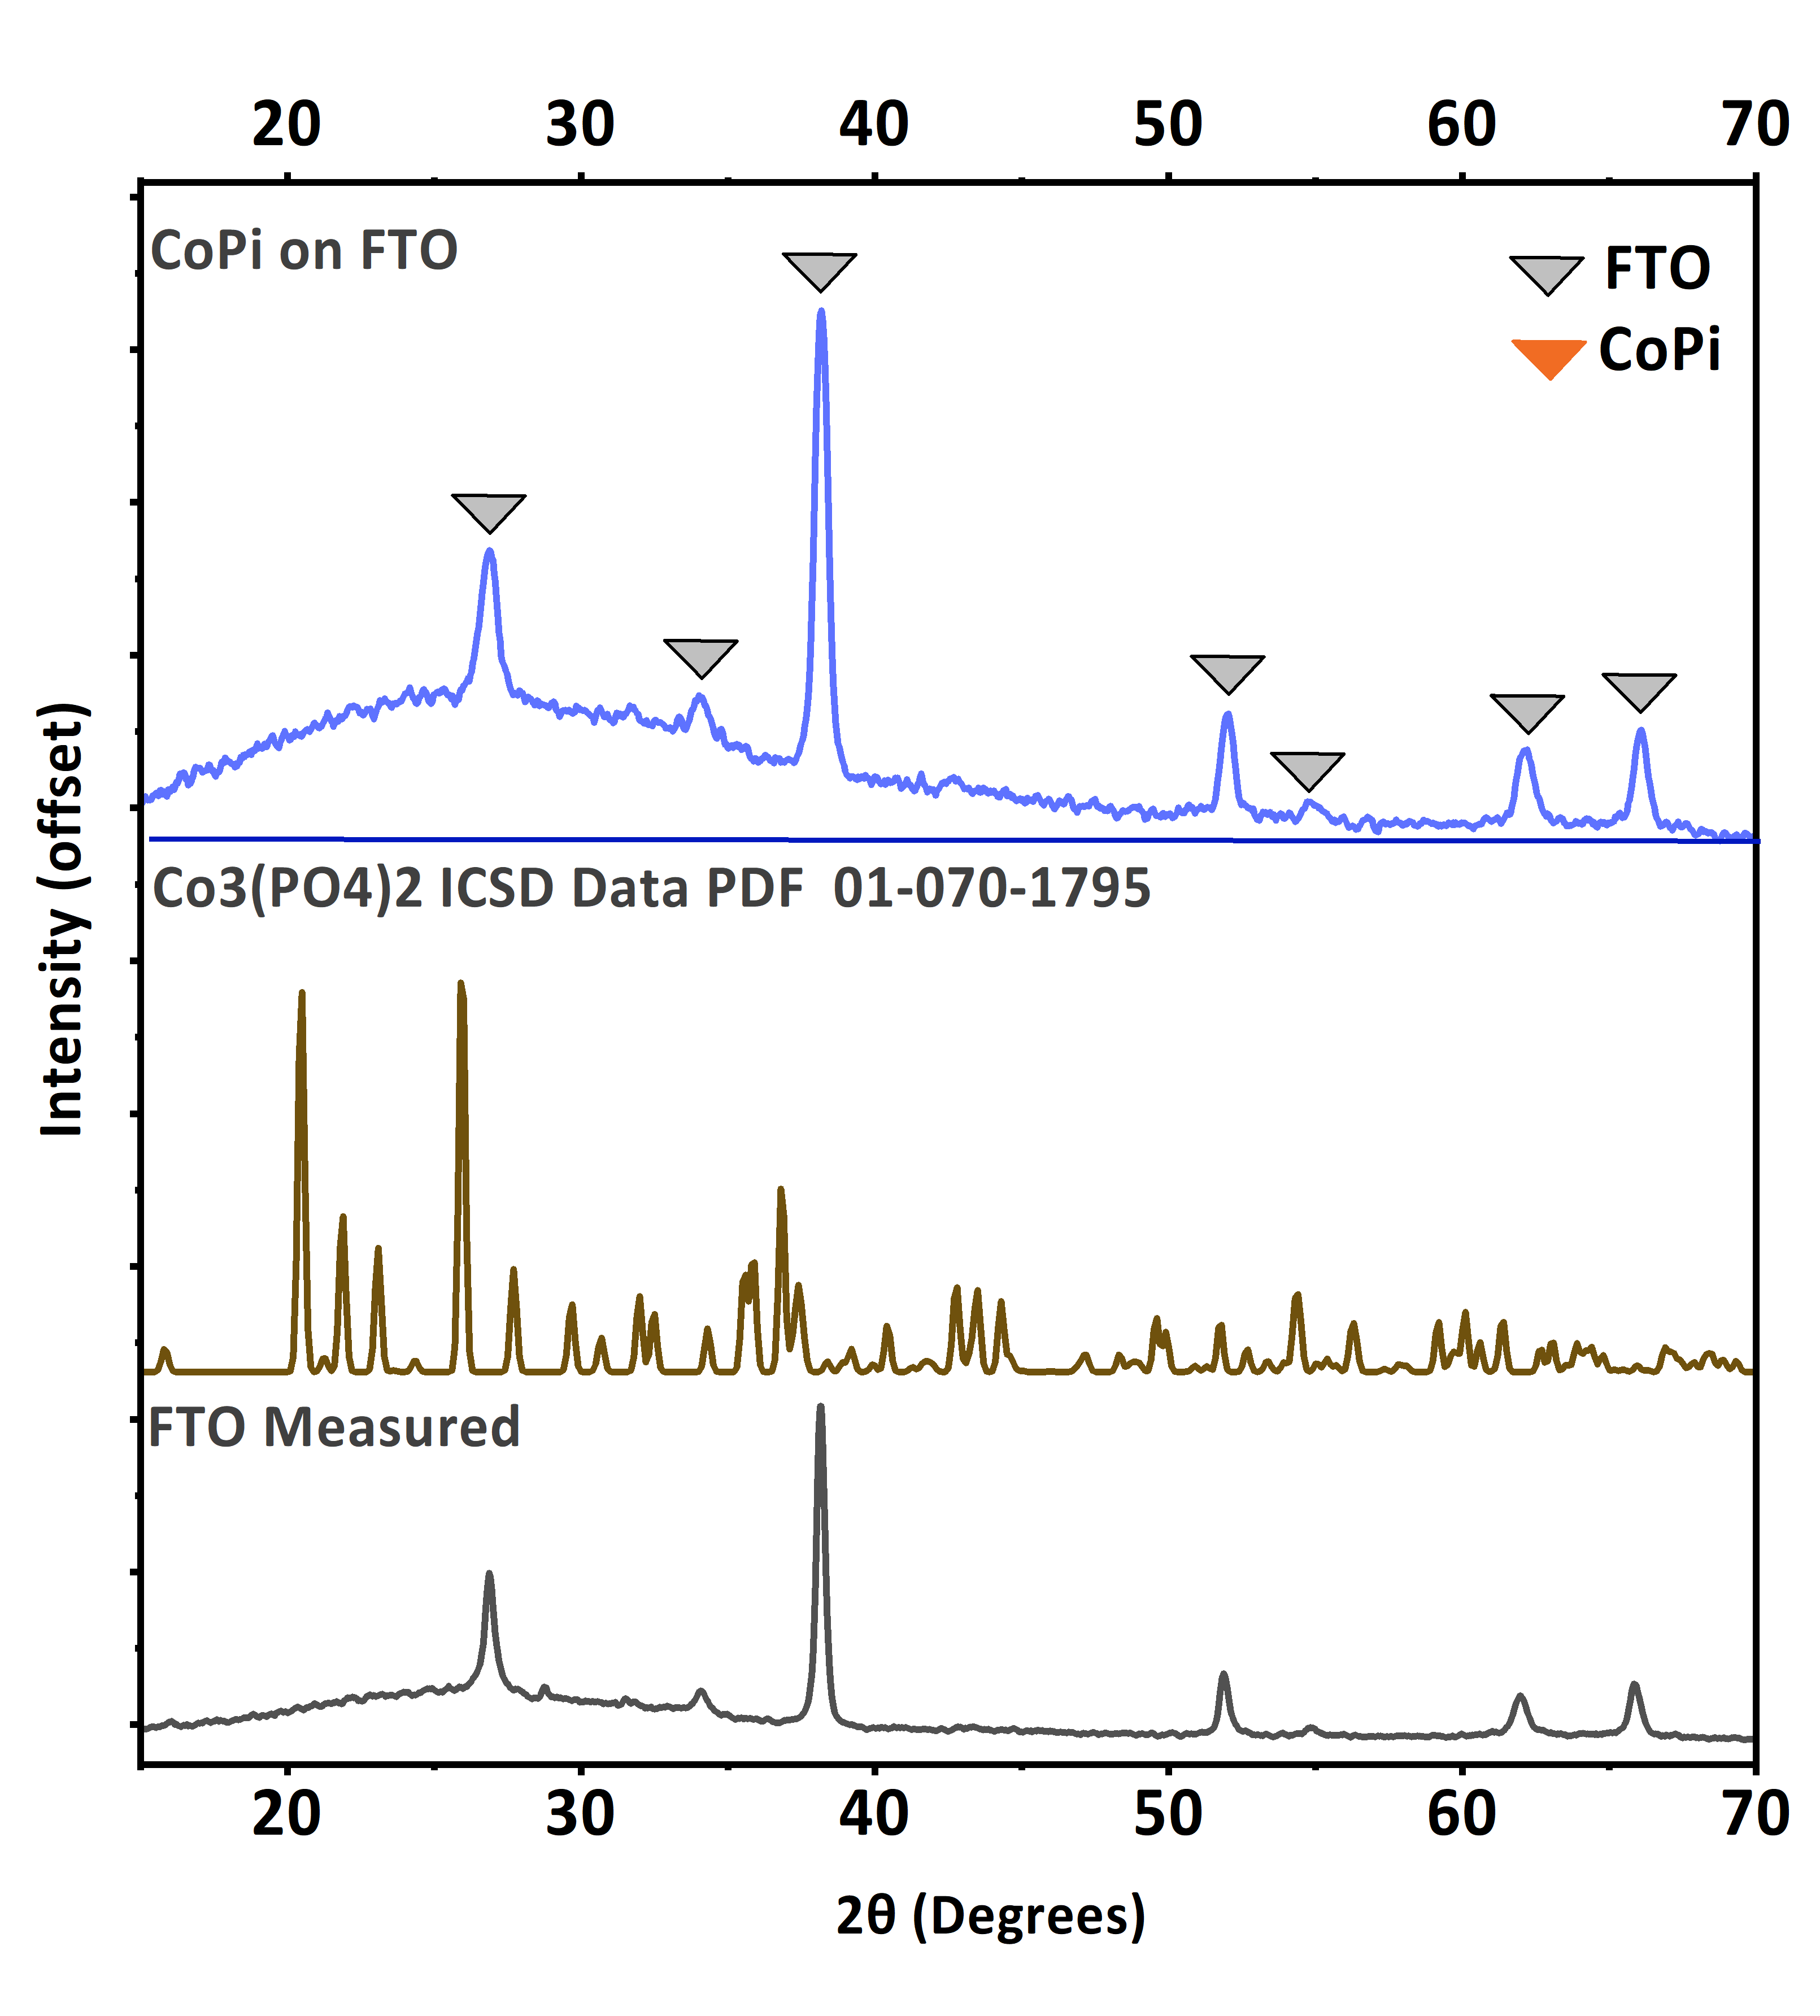


Figure S9**.** XRD characterization of PED-fabricated (PED)-CoPi compared to reference patterns


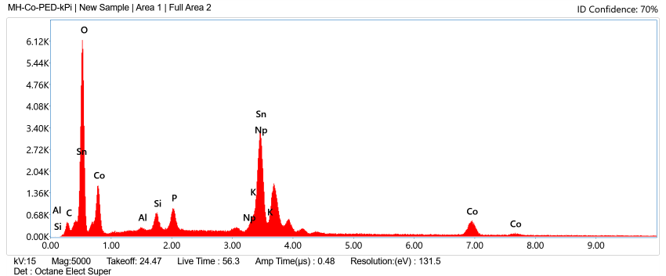


*Figure S10. X-ray spectra of elements detected by EDX analysis for (PED)-CoPi on FTO*

*
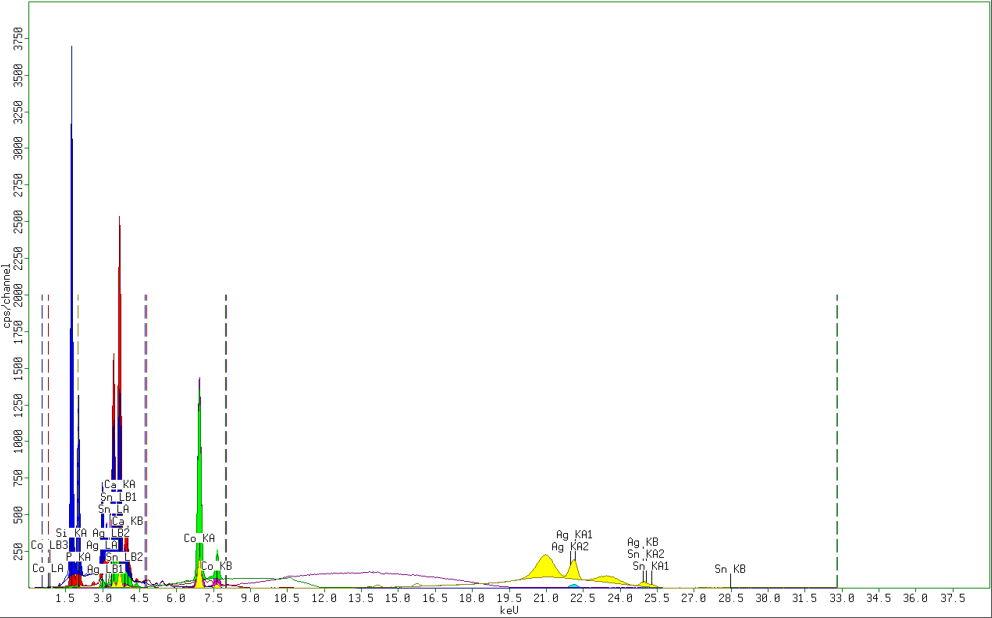
*

*Figure S11. X-ray spectra of elements detected by XRF analysis for (PED)-CoPi on FTO*


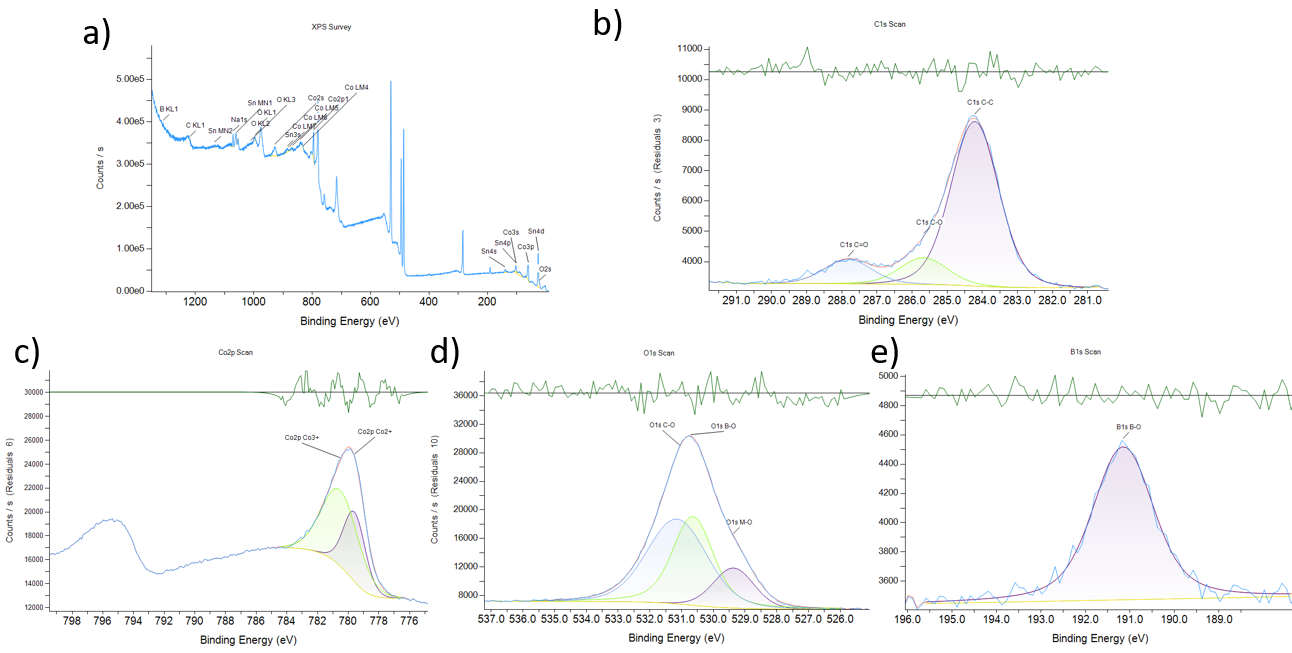


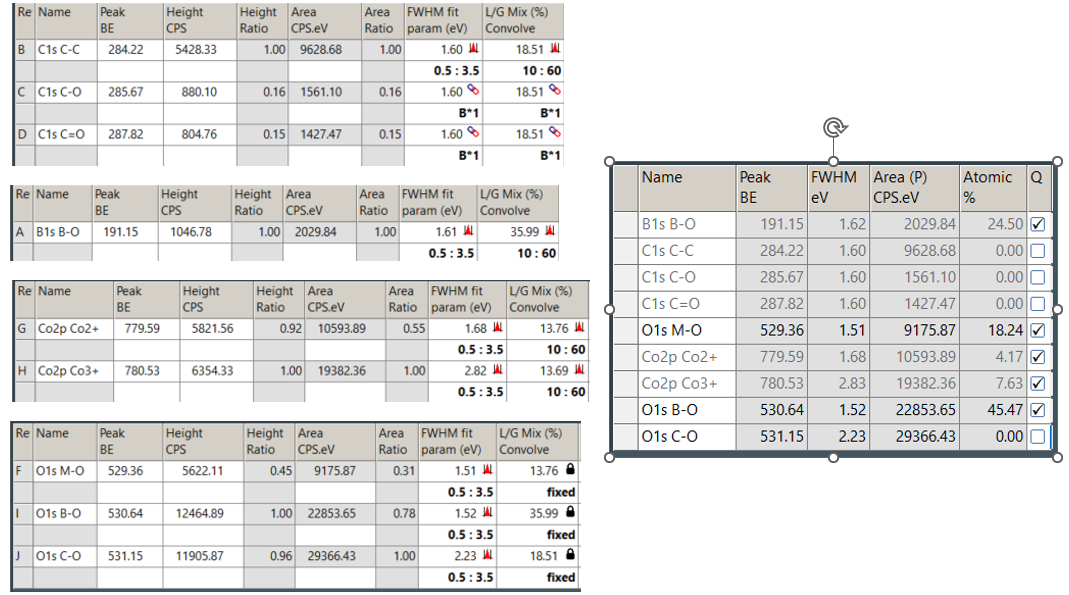


*Figure S12. XPS spectra of PED CoOx for a) survey scan, b) C 1s, c) Co 2p, d) O 1s, e) B 1s, and corresponding fitting data tables and atomic% calculated with Avantage software*

*
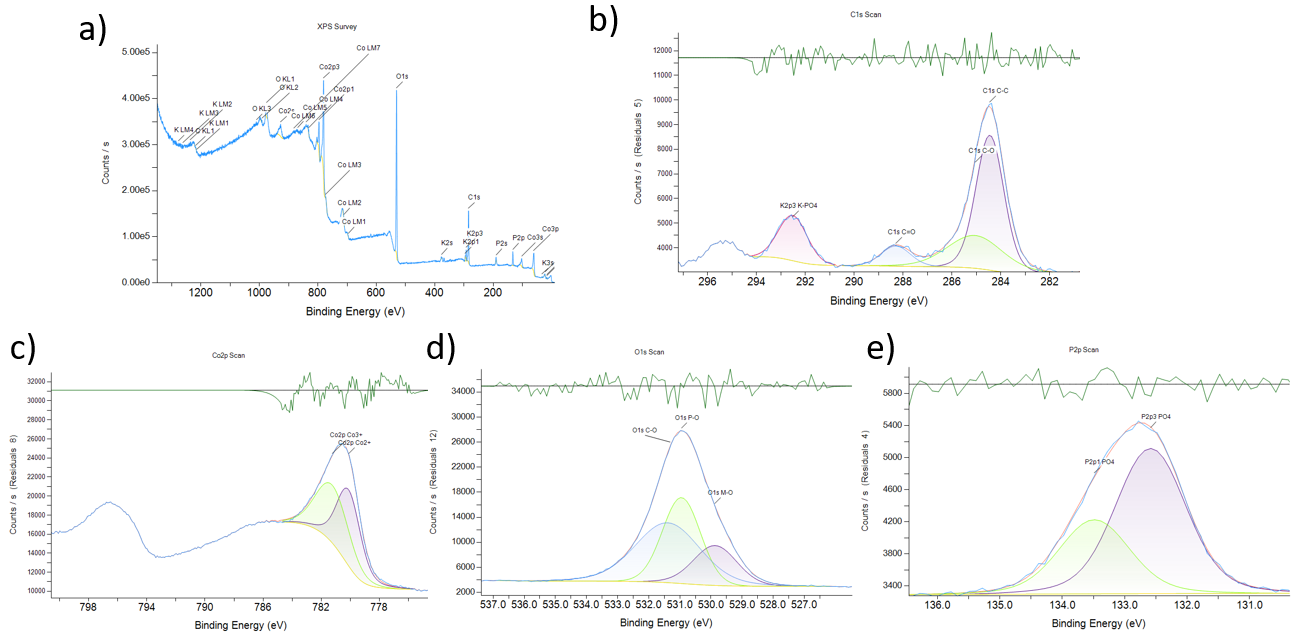
*

*
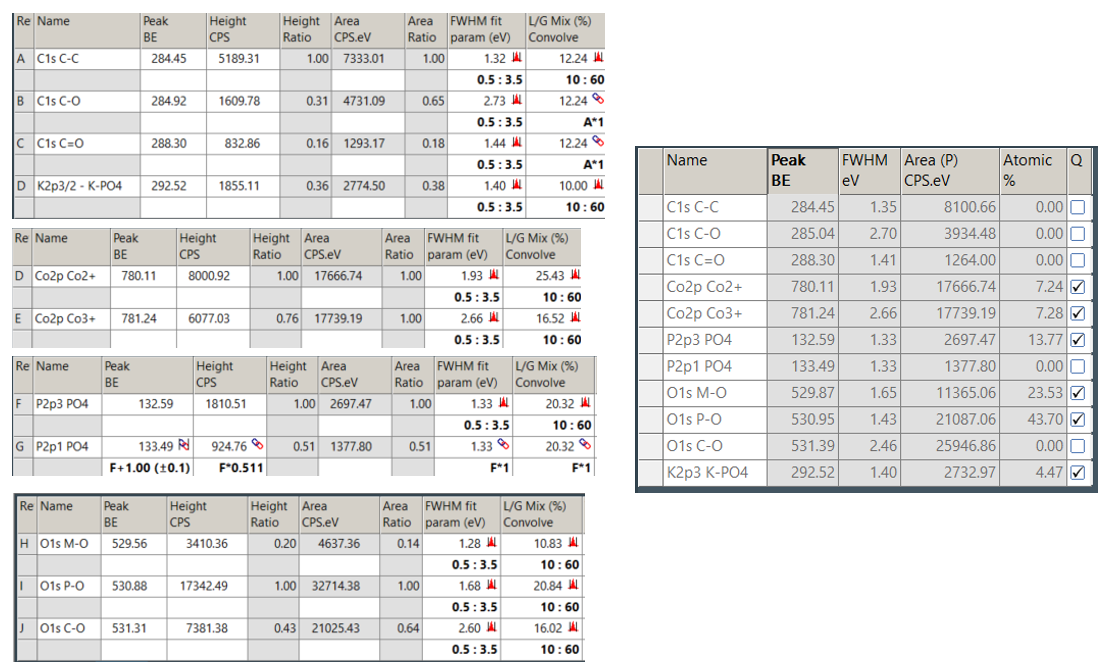
*

*Figure S13. XPS spectra of PED CoPi for a) survey scan, b) C 1s & K 2p, c) Co 2p, d) O 1s, e) P 2p, and corresponding fitting data tables and atomic% calculated with Avantage software*


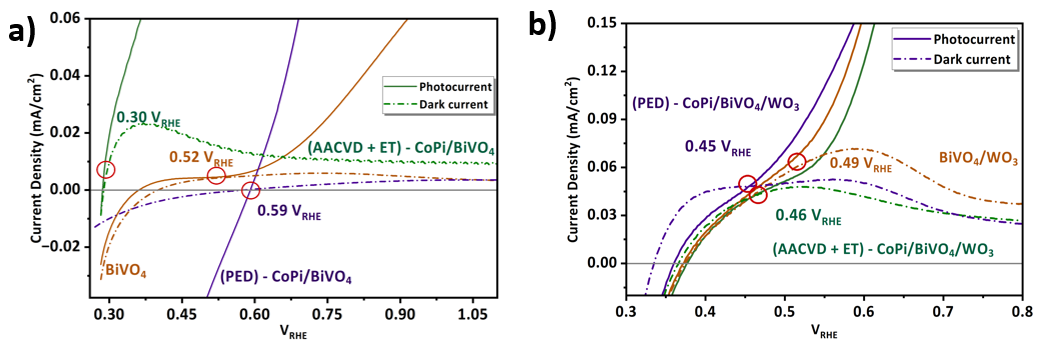


*Figure S14. Zoomed in determination of photocurrent onset potential from the potentials at which the photocurrent LSV curves first deviate from the dark current LSV curves in Figure 4*

*
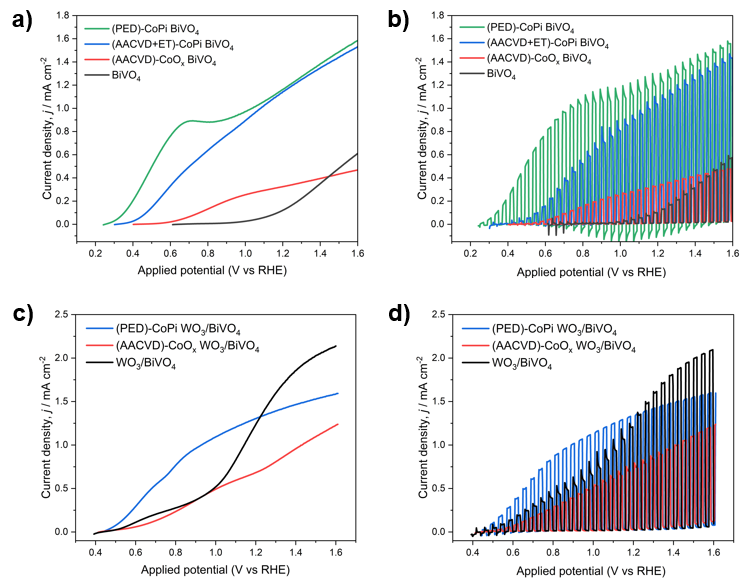
*

*Figure S15. BiVO4 electrodes with CoOx or CoPi co-catalysts under a) continuous and b) chopped illumination. WO3/BiVO4 electrodes with CoOx or CoPi co-catalysts under c) continuous and d) chopped illumination. All LSV measurements were taken under 1 sun (100 mW cm-2, AM 1.5G) simulated sunlight with a 20 mV/s scan rate and illumination in b) and d) were chopped with a frequency of 1 Hz.*

*
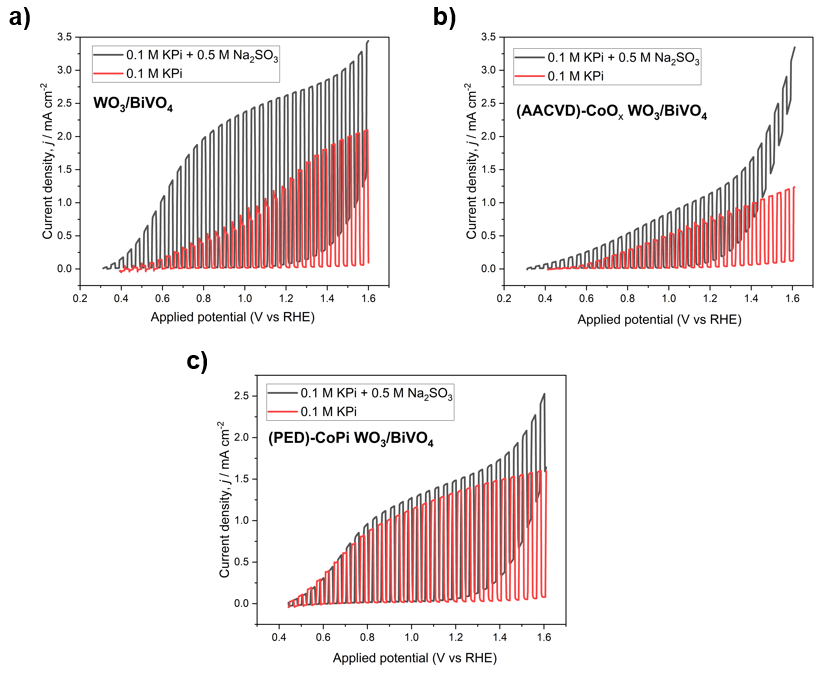
*

*Figure S16. Chopped linear sweep voltammetry for water and sulfite oxidation of WO3|BiVO4 heterojunction photoanodes: a) without a co-catalyst, b) with (AACVD)-CoOx, and c) with (PED)-CoPi. All LSV measurements were taken under 1 sun (100 mW cm-2, AM 1.5G) simulated sunlight with a 20 mV/s scan rate and chopped light measurements used a chopping frequency of 1 Hz.*

Table S2. Key parameters from chopped light LSV measurements under one sun illumination

| **Photoanode structure** | ***j*Na2SO3**  (mA cm-2) | ***j*H2O**  (mA cm-2) | (%) | (%) | **Vonset,H2O** (V) |
| --- | --- | --- | --- | --- | --- |
| BiVO4 | 0.66 | 0.15 | 30 | 22 | 1.09 |
| (AACVD)-CoOx  BiVO4 | 0.51 | 0.50 | 23 | 98 | 0.56 |
| (AACVD+ET)-CoPi BiVO4 | 1.83 | 1.17 | 84 | 64 | 0.48 |
| (PED)-CoPi BiVO4 | 1.53 | 1.19 | 70 | 78 | 0.31 |
| WO3/BiVO4 | 2.56 | 1.35 | 44 | 53 | 0.89 |
| (AACVD)- CoOx  WO3/BiVO4 | 1.18 | 0.72 | 20 | 61 | 0.74 |
| (PED)-CoPi WO3/BiVO4 | 1.54 | 1.33 | 27 | 86 | 0.47 |

jNa2SO3 = sulfite splitting photocurrent density (mA cm-2) at 1.23 VRHE under continuous one sun illumination

jH2O= water splitting photocurrent density (mA cm-2) at 1.23 VRHE under continuous one sun illumination

= charge separation efficiency (%)

= charge injection efficiency (%)

*V*onset,H2O = onset potential (V vs RHE) for water oxidation


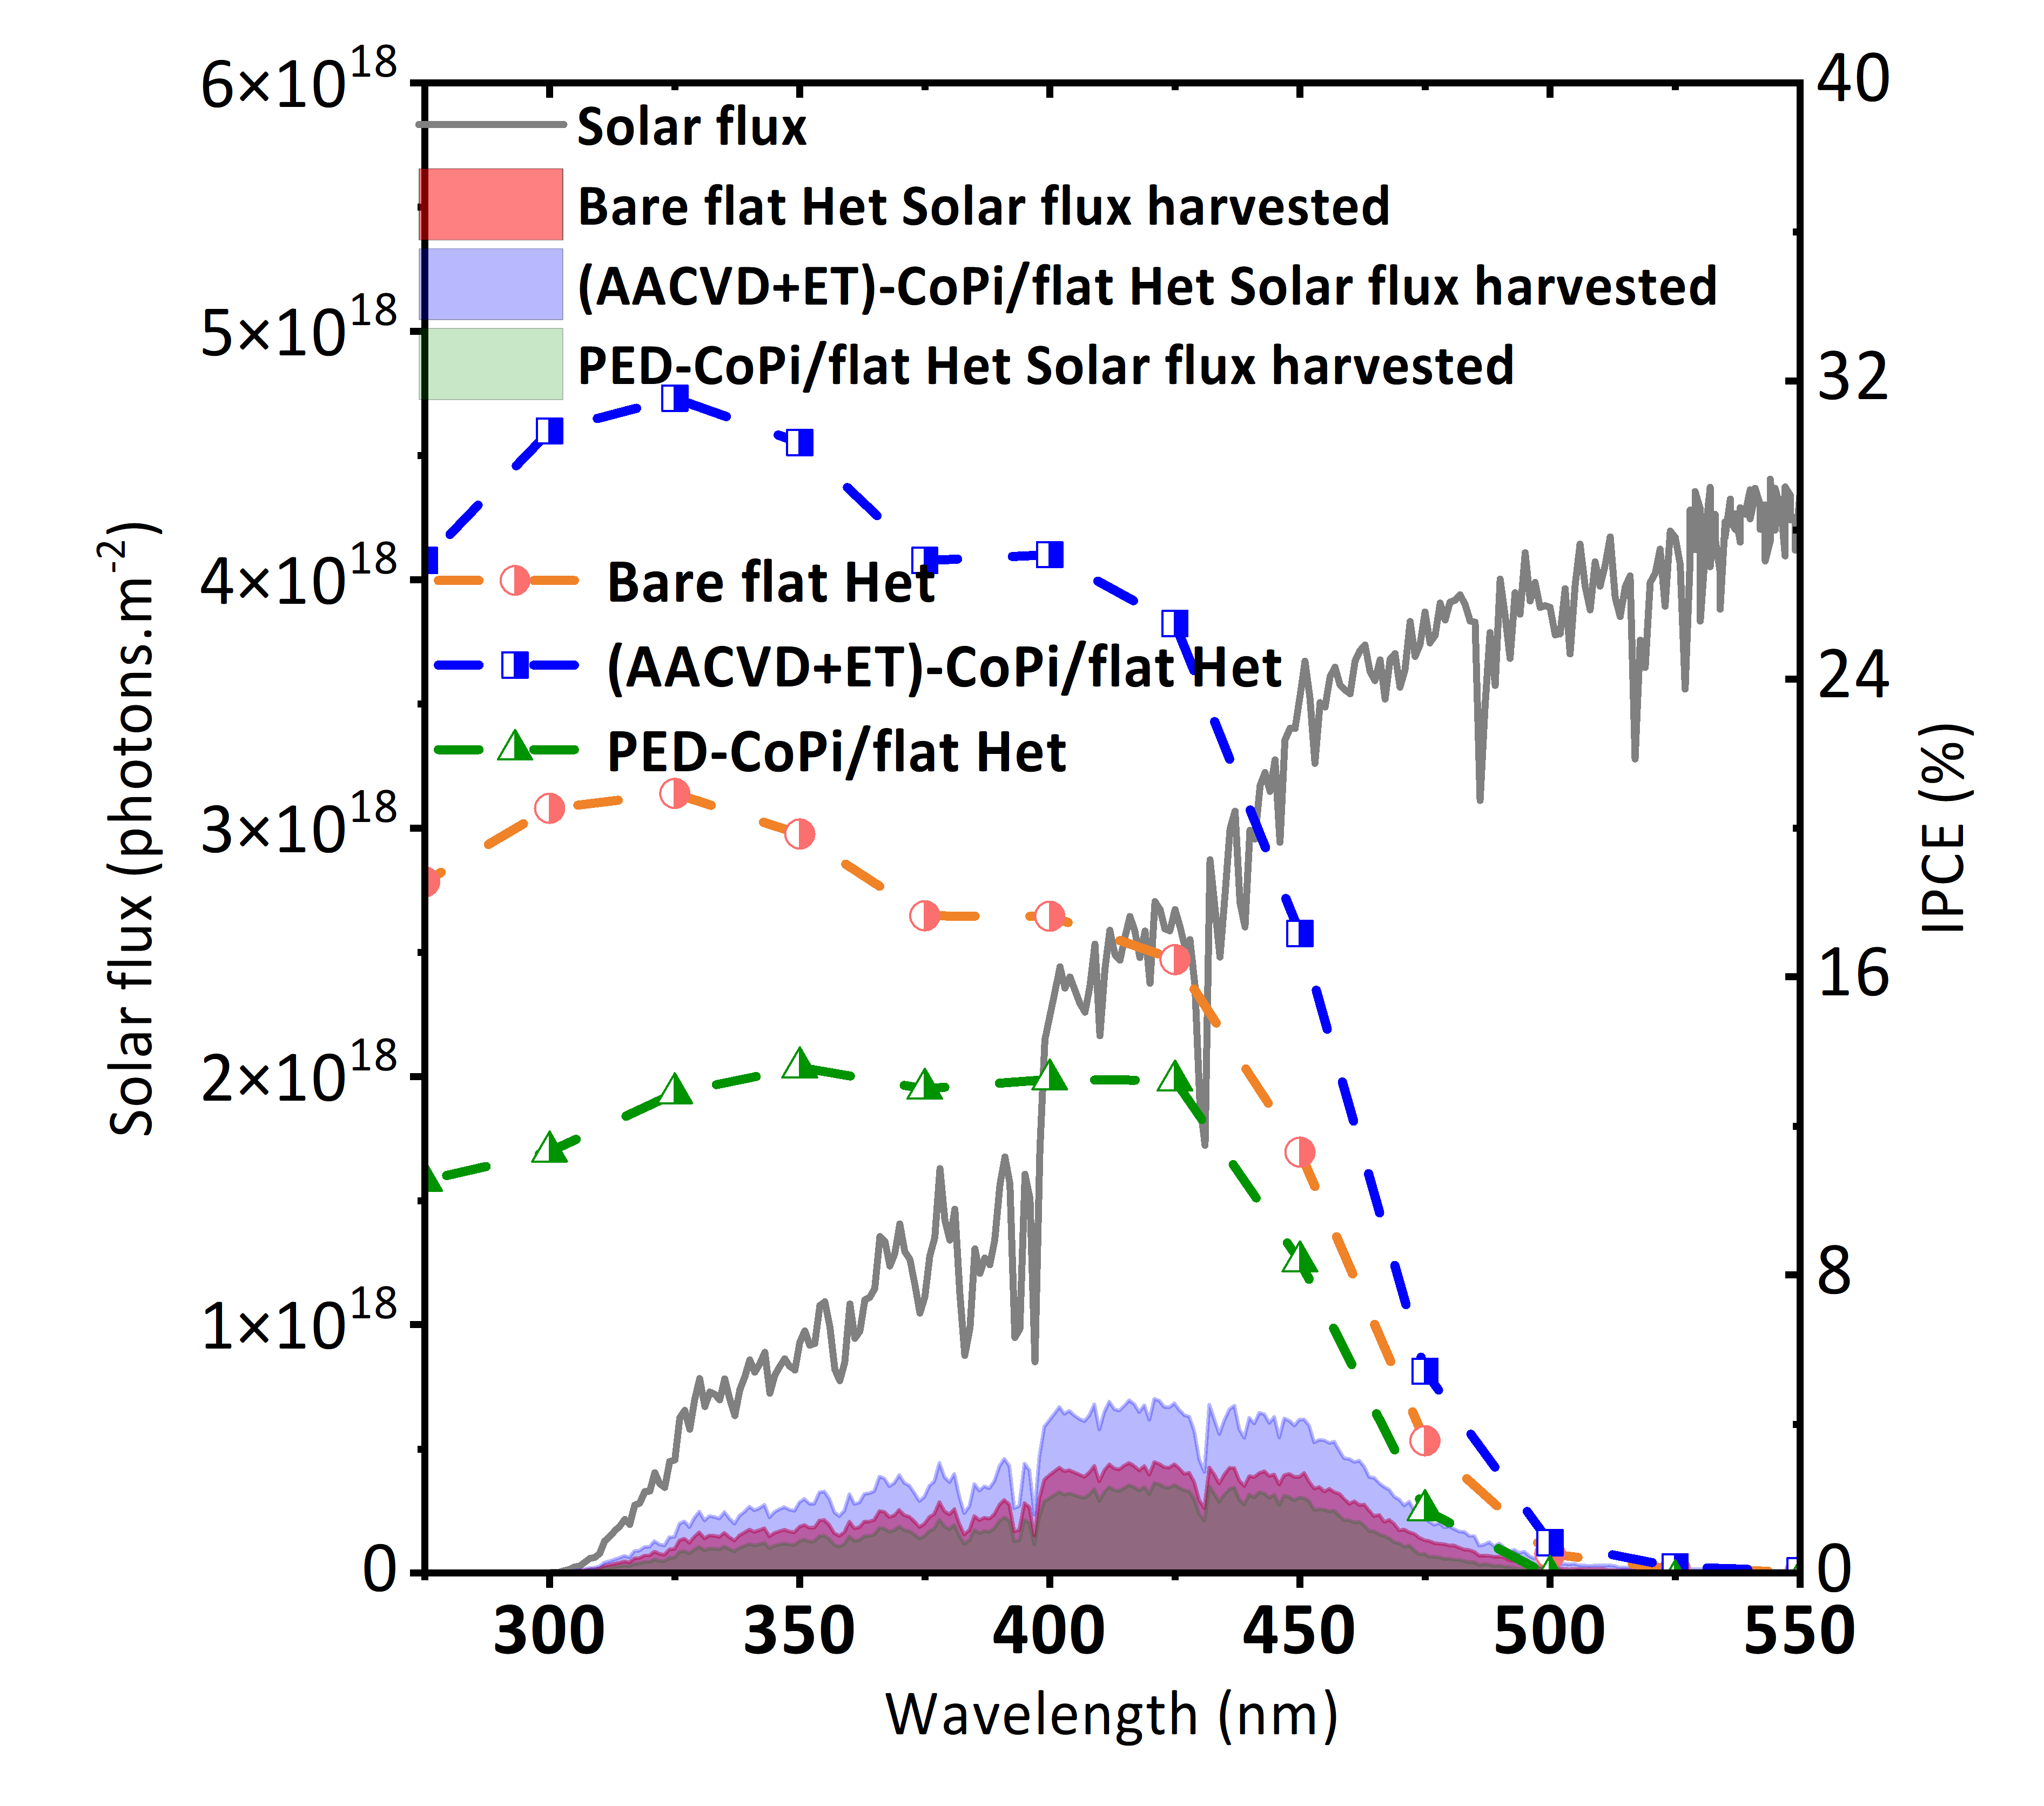


*Figure S17. (AACVD+ET)-CoPi deposited on flat BiVO4/WO3 heterojunction yielding an SPP of 1.12 mA cm-2 and a corresponding STH efficiency of 1.38%, which is an improvement over the bare flat heterojunction that exhibited an SPP of 0.71 mA cm-2 and a corresponding STH efficiency of 0.87% but is less effective than the nanostructured photoanodes.*

**References:**

1. National Renewable Energy Laboratory. Reference Air Mass 1.5 Spectra. https://www.nrel.gov/grid/solar-resource/spectra-am1.5.html.
